# Supplementary material
Source: publisher site journal article supplement (https://www.spandidos-publications.com/7596/downloadSupplementary)
Supplement: Supplementary file 1 [file downloadSupplementary]

## Sheet: Sheet1
Table SII. The results of clustering.
Sample	Group
GSM2544275	C1
GSM2544276	C1
GSM2544277	C2
GSM2544278	C2
GSM2544279	C2
GSM2544280	C2
GSM2544281	C2
GSM2544282	C2
GSM2544283	C2
GSM2544284	C2
GSM2544285	C2
GSM2544286	C2
GSM2544287	C2
GSM2544288	C2
GSM2544289	C2
GSM2544290	C2
GSM2544291	C2
GSM2544292	C2
GSM2544293	C1
GSM2544294	C2
GSM2544295	C1
GSM2544296	C1
GSM2544297	C2
GSM2544298	C1
GSM2544299	C1
GSM2544300	C1
GSM2544301	C1
GSM2544302	C1
GSM2544303	C2
GSM2544304	C1
GSM2544305	C1
GSM2544306	C1
GSM2544307	C1
GSM2544308	C1
GSM2544309	C1
GSM2544310	C1
GSM2544311	C1
GSM2544312	C1
GSM2544313	C1
GSM2544314	C1
GSM2544315	C2
